# Supplementary material
Source: PubMed Central journal article supplement (PMC4438544)
Supplement: IntJNP_14_0383_SUPPL_Figure.pdf [file IntJNP_14_0383_SUPPL_Figure.pdf]

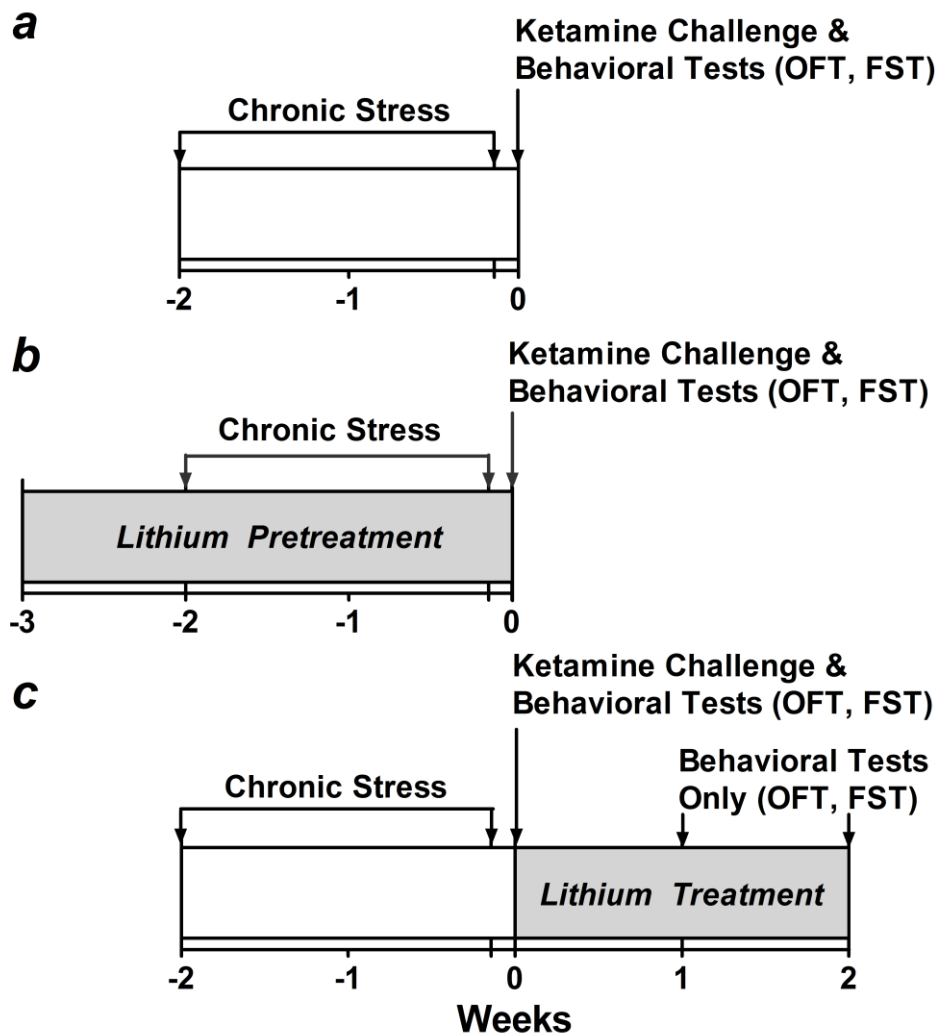

**Supplementary Figure S1.** Experimental protocol. At 10 weeks of age, CD-1 mice underwent chronic restraint stress for two weeks. One day after chronic restraint stress ended, mice were tested in the open-field test (OFT) and forced swim test (FST) 60 minutes after acute ketamine injection with a 30-minute rest interval between tests (a). For pre-ketamine lithium treatment, mice received lithium chloride in drinking water for three weeks prior to acute ketamine challenge and all behavioral tests (b). For post-ketamine lithium treatment, different cohort of stressed mice received lithium chloride in drinking water immediately after ketamine injection and behavioral tests. Both the OFT and FST were repeated in the same animals after one and two weeks of lithium treatment without ketamine challenge (c).
